# Supplementary material
Source: Springer Nature journal article supplement (https://www.springermedizin.de/resource/supplementary/12943_2010_884_MOESM5_ESM.PDF/9551950)
Supplement: MOESM5 [file 9551950]

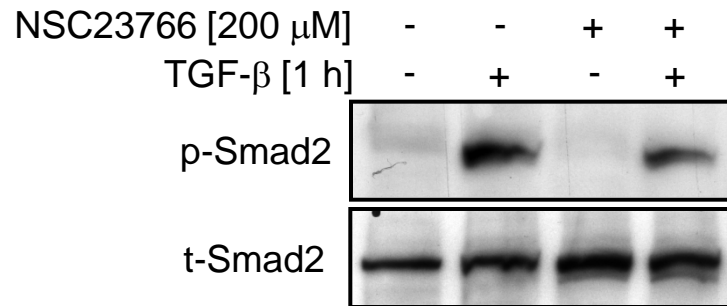

Legend to Figure S5: **TGF- $\beta$ 1-mediated C-terminal phosphorylation of Smad2 is sensitive to pharmacologic inhibition of Rac1.** COLO 357 cells were stimulated or not with TGF- $\beta$ 1 for 1 h in the absence or presence of the Rac1 inhibitor NSC23766. Crude protein extracts were fractionated by SDS-PAGE and sequentially immunoblotted for phosphorylated (p-) and total (t-) Smad2.
